# Supplementary material for: Butyrate in Human Milk: Associations with Milk Microbiota, Milk Intake Volume, and Infant Growth
Source: MDPI journal article supplement (doi:10.3390/nu15040916), 2023-02-11
Supplement: s1 [file s1]

## Supplementary materials

Supplementary Table S1 Study design

| Biological<br>sampling/measurement                | Age   |         |           |         |          |          |              |
|---------------------------------------------------|-------|---------|-----------|---------|----------|----------|--------------|
|                                                   | Birth | 2 weeks | 4-6 weeks | 6 weeks | 3 months | 6 months | 12<br>months |
| Recruitment                                       | v     |         |           |         |          |          |              |
| BM intake volume                                  |       |         | v         |         |          |          |              |
| Liquid BM sampling for<br>butyrate analysis       | v     | v       |           | v       | v        | v        | v            |
| Sterile sampling of BM for<br>microbiome analysis |       |         |           | v       |          |          |              |
| Infant anthropometric<br>measurement              | v     | v       |           | v       | v        | v        | v            |

**Supplementary Table S2 Number of subjects with sample availability for each experiment**

| Experiment                                                             | Number of subjects |
|------------------------------------------------------------------------|--------------------|
| Total included in longitudinal analyses between HM butyrate and growth | 71                 |
| • HM butyrate measured at 6 weeks                                      | 59                 |
| • HM butyrate intake estimated between 4-6 weeks                       | 47                 |
| Total included in microbiome study                                     | 69                 |
| • With HM butyrate concentrations                                      | 56                 |

**Supplementary Table S3 The associations between maternal/infant factors and HM butyrate concentration at 6 weeks**

| Factors                                                             | HM butyrate concentration at 6 weeks |      |
|---------------------------------------------------------------------|--------------------------------------|------|
|                                                                     | Correlation coefficient*             | p    |
| Maternal age at delivery (years)                                    | 0.08                                 | 0.55 |
| Maternal pre-pregnancy BMI (kg/m <sup>2</sup> )                     | -0.02                                | 0.87 |
| Maternal height (cm)                                                | -0.24                                | 0.08 |
| Parity (primiparous vs multiparous)                                 | -0.18                                | 0.28 |
| Maternal ethnicity (White European vs others)                       | -0.23                                | 0.33 |
| Gestational age (weeks)                                             | 0.07                                 | 0.59 |
| Infant sex (male vs female)                                         | -0.01                                | 0.93 |
| Exclusive breastfeeding duration ( $\geq 12$ weeks vs $< 12$ weeks) | -0.36                                | 0.06 |

\*Pearson R for continuous and point-biserial correlation for categorical variables

BMI, body mass index; IMD, index of multiple deprivation

**Supplementary Table S4 Cross-sectional associations between HM butyrate concentrations and infant growth parameters**

| Growth parameters  | Butyrate concentration (mg/100 mL) |             |
|--------------------|------------------------------------|-------------|
|                    | B±SE                               | <i>p</i>    |
| <b>2 weeks</b>     |                                    |             |
| Weight SDS         | -0.18±0.15                         | 0.25        |
| Length SDS         | -0.06±0.25                         | 0.81        |
| BMI SDS            | -0.22±0.24                         | 0.36        |
| Mean skinfolds SDS | -0.11±0.29                         | 0.7         |
| <b>6 weeks</b>     |                                    |             |
| Weight SDS         | -0.4±0.19                          | <b>0.04</b> |
| Length SDS         | -0.22±0.21                         | 0.29        |
| BMI SDS            | -0.4±0.23                          | 0.09        |
| Mean skinfolds SDS | -0.44±0.24                         | 0.08        |
| <b>3 months</b>    |                                    |             |
| Weight SDS         | -0.21±0.18                         | 0.23        |
| Length SDS         | -0.18±0.12                         | 0.17        |
| BMI SDS            | -0.15±0.2                          | 0.47        |
| Mean skinfolds SDS | 0.03±0.18                          | 0.85        |
| <b>6 months</b>    |                                    |             |
| Weight SDS         | 0.05±0.21                          | 0.81        |
| Length SDS         | -0.06±0.15                         | 0.7         |
| BMI SDS            | 0.12±0.23                          | 0.63        |
| Mean skinfolds SDS | 0.05±0.21                          | 0.81        |

Values are unstandardized regression coefficients (B) and the corresponding standard errors (SE)

All subjects were exclusively breastfed in the first 6 weeks of life

Models are adjusted for infant sex, gestational age, postnatal age at visit, and birth weight SDS. Models at 3- and 6- months are additionally adjusted feeding history (EBF for 6-11 weeks vs EBF for ≥12 weeks)

Associations with  $p < 0.05$  are highlighted in bold

**Supplementary Figure S1 HM butyrate concentration based on EBF duration**

0=EBF duration 6 weeks-3 months, 1=EBF duration  $\geq 3$  months

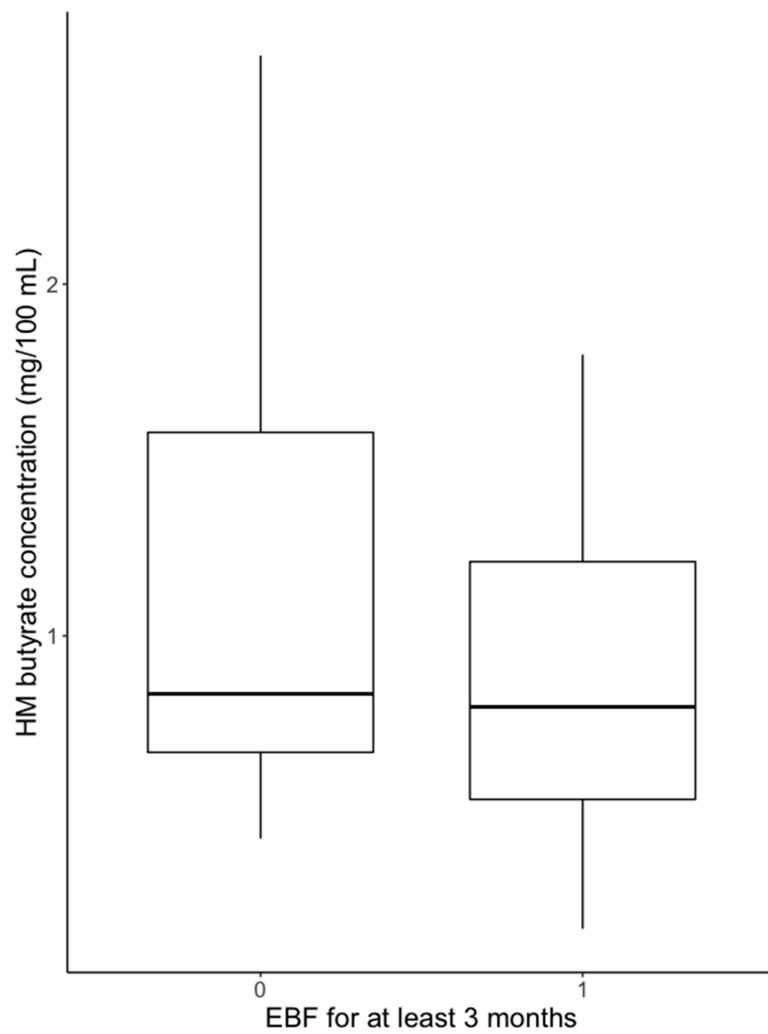

HM=human milk

EBF=exclusive breastfeeding

## Supplementary Figure S2 Average composition of HM microbiota

The fraction of 16S rRNA reads (in %) attributed to specific taxonomic level is given below the taxon name. Figure is generated using software described in Sundquist A, Bigdeli S, Jalili R, Druzin ML, Waller S, Pullen KM, El-Sayed YY, Taslimi MM, Batzoglou S, Ronaghi M. Bacterial flora-typing with targeted, chip-based Pyrosequencing. BMC Microbiol. 2007 Nov 30;7:108. doi: 10.1186/1471-2180-7-108. PMID: 18047683; PMCID: PMC2244631.

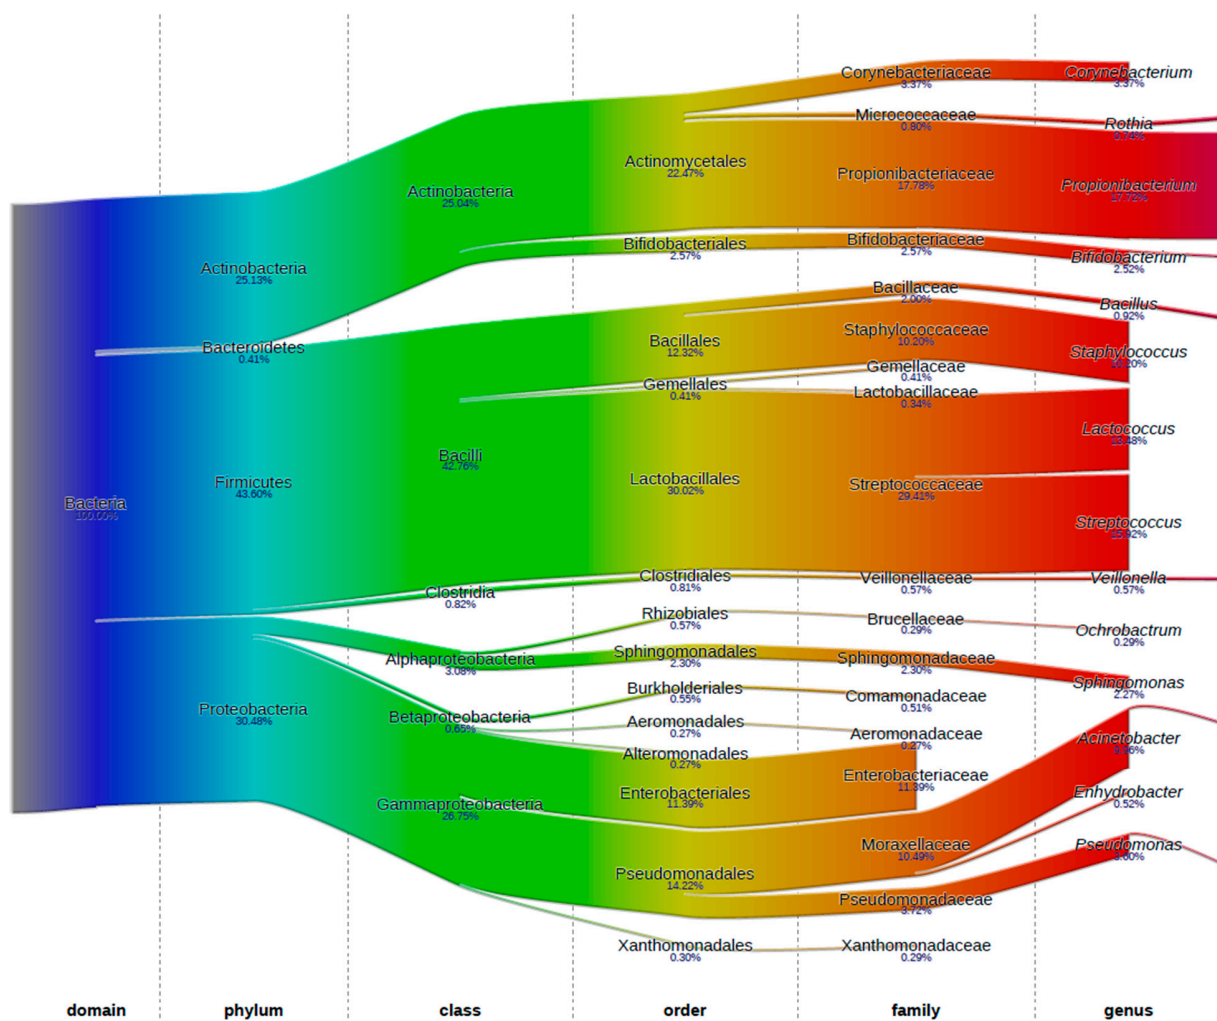

Supplementary Figure S3 Longitudinal weight gain trajectories based on HM butyrate concentration

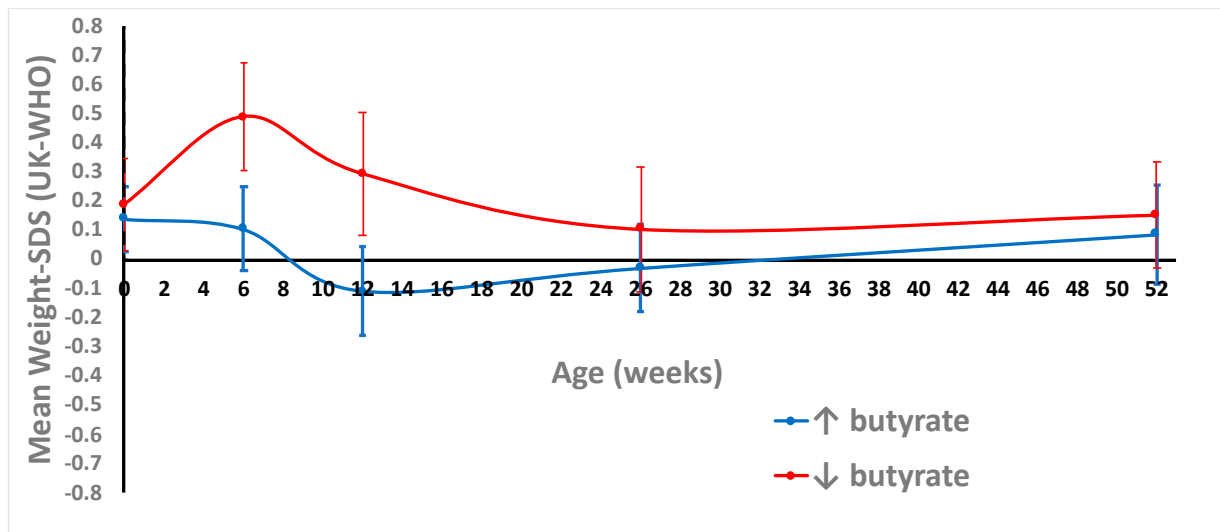

Following UK guidelines, weight values were converted to sex and age-adjusted SDS using the British 1990 growth reference at birth and subsequently using WHO International Growth Standard. Grey shaded-square represents minimum EBF period for all participants (all subjects received EBF for at least 6 weeks).

EBF=exclusive breastfeeding, SDS=standard deviation scores
